# Supplementary material for: ALS patients’ regulatory T lymphocytes are dysfunctional, and correlate with disease progression rate and severity
Source: JCI journal article supplement (doi:10.1172/jci.insight.89530), 2017-03-08
Supplement: sd1 [file 1]

# TABLE 1

| <u>Rate</u> <sup>1</sup> | <u>Gender</u> <sup>2</sup> | <u>Age</u> | <u>AALS</u> | <u>ALSFRS-R</u> |
|--------------------------|----------------------------|------------|-------------|-----------------|
| Slow                     | M                          | 63         | 55          | 35              |
| Slow                     | F                          | 46         | 72          | 34              |
| Slow                     | F                          | 57         | 44          | 42              |
| Slow                     | M                          | 45         | 56          | 35              |
| Slow                     | M                          | 58         | 63          | 38              |
| Slow                     | M                          | 63         | 52          | 36              |
| Slow                     | M                          | 74         | 42          | 44              |
| Slow                     | M                          | 71         | 50          | 41              |
| Slow                     | F                          | 66         | 48          | 41              |
| Slow                     | M                          | 60         | 50          | 36              |
| Slow                     | M                          | 63         | 79          | 28              |
| Slow                     | F                          | 72         | 66          | 37              |
| Slow                     | F                          | 68         | 71          | 28              |
| Rapid                    | F                          | 70         | 47          | 39              |
| Rapid                    | M                          | 59         | 100         | 20              |
| Rapid                    | M                          | 45         | 79          | 27              |
| Rapid                    | M                          | 53         | 101         | 20              |
| Rapid                    | F                          | 53         | 115         | 20              |
| Rapid                    | M                          | 49         | 66          | 39              |
| Rapid                    | M                          | 41         | 106         | 25              |
| Rapid                    | M                          | 59         | 120         | 21              |
| Rapid                    | M                          | 62         | 98          | 23              |
| Rapid                    | M                          | 57         | 50          | 39              |
| Rapid                    | M                          | 65         | 100         | 20              |
| Rapid                    | F                          | 66         | 48          | 39              |
| Rapid                    | F                          | 70         | 145         | 20              |
| Rapid                    | F                          | 66         | 98          | 21              |
| Control                  | F                          | 65         | N/A         | N/A             |
| Control                  | M                          | 58         | N/A         | N/A             |
| Control                  | M                          | 60         | N/A         | N/A             |
| Control                  | F                          | 50         | N/A         | N/A             |
| Control                  | F                          | 72         | N/A         | N/A             |
| Control                  | F                          | 54         | N/A         | N/A             |
| Control                  | M                          | 58         | N/A         | N/A             |
| Control                  | M                          | 55         | N/A         | N/A             |
| Control                  | F                          | 31         | N/A         | N/A             |
| Control                  | M                          | 61         | N/A         | N/A             |
| Control                  | M                          | 41         | N/A         | N/A             |
| Control                  | M                          | 45         | N/A         | N/A             |
| Control                  | M                          | 60         | N/A         | N/A             |
| Control                  | F                          | 41         | N/A         | N/A             |
| Control                  | F                          | 70         | N/A         | N/A             |
| Control                  | M                          | 73         | N/A         | N/A             |
| Control                  | F                          | 55         | N/A         | N/A             |

**Demographics of patients with ALS and healthy volunteer controls.**

1. Rate = rate of disease progression. 2. M = male and F = female.
